# Supplementary material for: 100‐year time series reveal little morphological change following impoundment and predator invasion in two Neotropical characids
Source: PubMed Central journal article supplement (PMC6691216; doi:10.1111/eva.12763), 2019-02-27

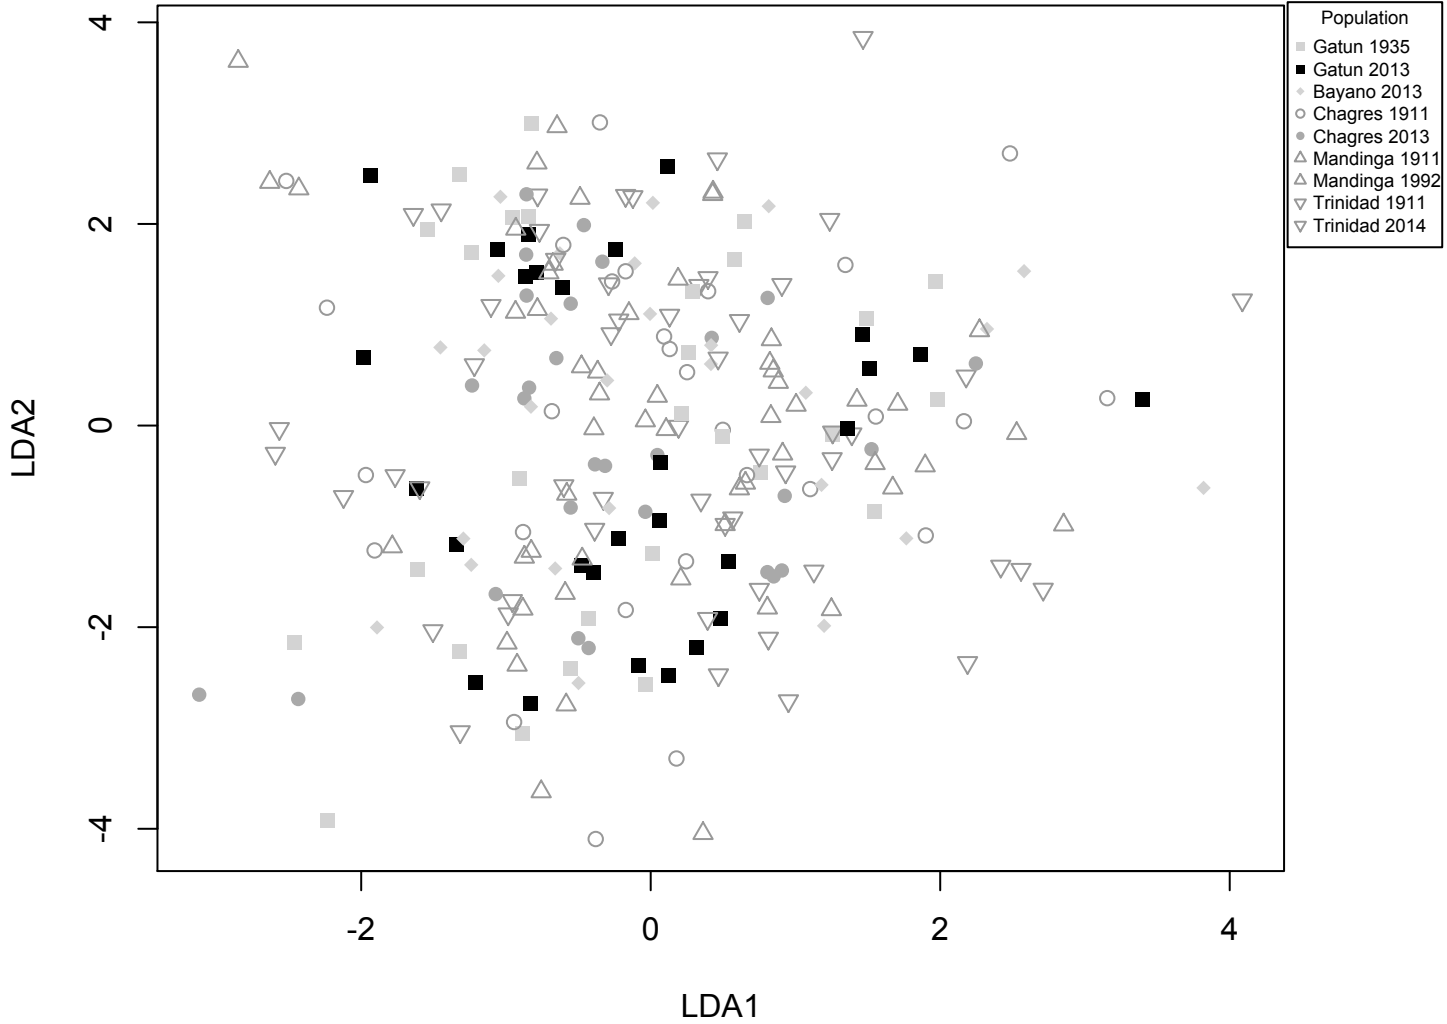

Supplement: EVA-12-1385-s005.pdf [file EVA-12-1385-s005.pdf]
